# Supplementary material
Source: PubMed Central journal article supplement (PMC6531928)
Supplement: mmc1.pdf [file mmc1.pdf]

**Biophysical Journal, Volume 116**

**Supplemental Information**

**Quantifying Dynamic Regulation in Metabolic Pathways with Nonparametric Flux Inference**

**Fei He and Michael P.H. Stumpf**

## SUPPLEMENTARY MATERIAL

### 1. Supplementary Information

#### 1.1. MULTI-OUTPUT GAUSSIAN PROCESS

The  $K_{*o}^M$ ,  $K_{o*}^M$  and  $K_{**}^M$  in (18) are defined as:

$$K_{*o}^M = \begin{bmatrix} C_{ij}(t_{1,1}^* - t_{1,1}) \cdots C_{ij}(t_{1,1}^* - t_{1,R_1}) & \cdots & C_{ij}(t_{1,1}^* - t_{N,1}) \cdots C_{ij}(t_{1,1}^* - t_{N,R_N}) \\ \vdots & \ddots & \vdots \\ C_{ij}(t_{N,R'_N}^* - t_{1,1}) \cdots C_{ij}(t_{N,R'_N}^* - t_{1,R_1}) & \cdots & C_{ij}(t_{N,R'_N}^* - t_{N,1}) \cdots C_{ij}(t_{N,R'_N}^* - t_{N,R_N}) \end{bmatrix}_{[R_o \times R]}$$

$$K_{**}^M = \begin{bmatrix} C_{ij}(t_{1,1}^* - t_{1,1}^*) \cdots C_{ij}(t_{1,1}^* - t_{1,R_1}^*) & \cdots & C_{ij}(t_{1,1}^* - t_{N,1}^*) \cdots C_{ij}(t_{1,1}^* - t_{N,R'_N}^*) \\ \vdots & \ddots & \vdots \\ C_{ij}(t_{N,R'_N}^* - t_{1,1}^*) \cdots C_{ij}(t_{N,R'_N}^* - t_{1,R_1}^*) & \cdots & C_{ij}(t_{N,R'_N}^* - t_{N,1}^*) \cdots C_{ij}(t_{N,R'_N}^* - t_{N,R'_N}^*) \end{bmatrix}_{[R_o \times R]}$$

and  $K_{o*}^M = (K_{*o}^M)^T$

#### 1.2. PROBABILITY DENSITY OF THE RATIO BETWEEN TWO DEPENDENT GAUSSIAN VARIABLES

The probability density of the ratio between two dependent Gaussian variables (i.e.  $z = x/y$ ,  $x \sim \mathcal{N}(\mu_x, \sigma_x^2)$  and  $y \sim \mathcal{N}(\mu_y, \sigma_y^2)$ ) can be calculated from the means, standard deviations and correlation coefficient of the two Gaussian variables:

$$p_z(z; \mu_x, \mu_y; \sigma_x, \sigma_y; r) = K \frac{2(1-r^2\sigma_x^2\sigma_y^2)}{\sigma_y^2 Z^2 - 2r\sigma_x\sigma_y z + \sigma_x^2} \cdot F\left(1; \frac{1}{2}; \theta_2(z)\right) \quad (28)$$

where

$$\theta_2(z) = \frac{(-\sigma_y^2 \mu_x z + r\sigma_x \sigma_y (\mu_y z + \mu_x) - \mu_y \sigma_x^2)^2}{2\sigma_x^2 \sigma_y^2 (1-r^2) (\sigma_y^2 z^2 - 2r\sigma_x \sigma_y z + \sigma_x^2)}$$

$$K = \frac{1}{2\pi\sigma_x\sigma_y\sqrt{1-r^2}} \cdot \exp\left(-\frac{\sigma_y^2 \mu_x^2 - 2r\sigma_x \sigma_y \mu_x \mu_y + \mu_y^2 \sigma_x^2}{2(1-r^2)\sigma_x^2 \sigma_y^2}\right)$$

$$F(\alpha; \gamma; \beta) = \sum_{k=0}^{\infty} \frac{(\alpha, k)}{(\gamma, k)} \cdot \frac{\beta^k}{k!}, \quad \gamma \neq 0, -1, -2, \dots$$

where the Pochhammer symbol  $(\alpha, k)$  is defined by  $(\alpha, k) = \alpha(\alpha+1)\cdots(\alpha+k-1) = \Gamma(\alpha+k)/\Gamma(\alpha)$  with  $\Gamma$  the Gamma function.  $r$  is the correlation coefficient between the two Gaussian variables.
